# Supplementary material for: Mesoporous NiCo2O4 nanospheres with a high specific surface area as electrode materials for high-performance supercapacitors
Source: Royal Society of Chemistry journal article supplement (doi:10.1039/c6ra14099h), 2016-01-01
Supplement: c6ra14099h1.pdf [file c6ra14099h1.pdf]

## ***Supporting Information***

### **Mesoporous NiCo<sub>2</sub>O<sub>4</sub> nanospheres with high specific surface area as electrode materials for high-performance supercapacitors**

M. J. Pang<sup>a</sup>, S. Jiang<sup>b</sup>, G. H. Long<sup>c</sup>, Y. Ji<sup>a\*</sup>, W. Han<sup>a</sup>, B. Wang<sup>d</sup>, X. L. Liu<sup>a</sup>, Y. L.

Xi<sup>a</sup>, F. Z. Xu<sup>a</sup> and G. D. Wei<sup>a\*\*</sup>

a. Key Laboratory of Physics and Technology for Advanced Batteries, Ministry of Education, College of physics, Jilin University, Changchun, 130012, P. R. China

b. State Key Laboratory of Inorganic Synthesis and Preparative Chemistry, College of Chemistry, Jilin University, Changchun 130012, P. R. China.

c. College of Life Sciences, Jilin Agricultural University, Changchun, 130118, P. R. China

d. School of Science, University of Science and Technology Liaoning, Anshan 114051, P. R. China

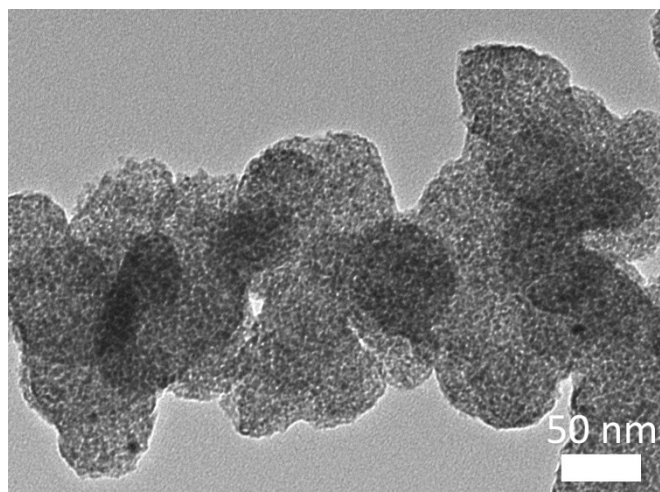

**Fig. S1** High resolution TEM images of NiCo<sub>2</sub>O<sub>4</sub> nanospheres

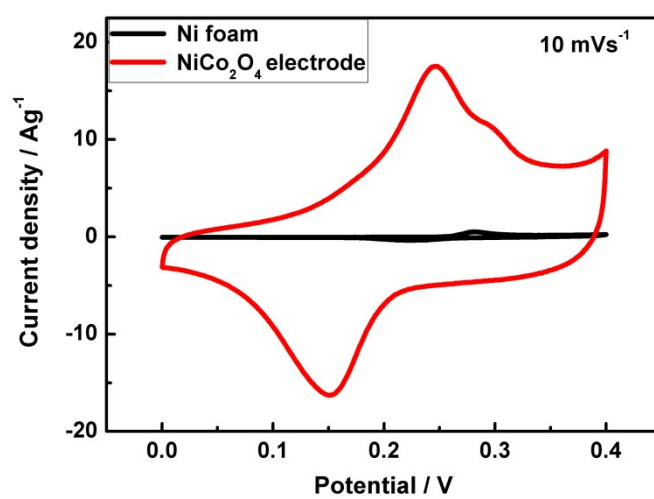

**Fig. S2** CV curves of NiCo<sub>2</sub>O<sub>4</sub> electrode and Ni foam substrate at 10mVs<sup>-1</sup>

**Table S1 Comparison of the electrochemical performances of the as-prepared AC//NiCo<sub>2</sub>O<sub>4</sub> ASC with previously reported NiCo<sub>2</sub>O<sub>4</sub>-based ASCs**

| Sample                                                     | Energy density (maximum)         | Power density                  | Ref.             |
|------------------------------------------------------------|----------------------------------|--------------------------------|------------------|
| RGO// NiCo <sub>2</sub> O <sub>4</sub>                     | 23.9 W h kg <sup>-1</sup>        | 650 W kg <sup>-1</sup>         | 13               |
| AC//C/CoNi <sub>3</sub> O <sub>4</sub>                     | 29.1 W h kg <sup>-1</sup>        | 130.4 W kg <sup>-1</sup>       | 20               |
| AC//CQDs/NiCo <sub>2</sub> O <sub>4</sub>                  | 27.8 W h kg <sup>-1</sup>        | 128 W kg <sup>-1</sup>         | 47               |
| AC//CNT@NiCo <sub>2</sub> O <sub>4</sub>                   | 19.7 W h kg <sup>-1</sup>        | 62.5 W kg <sup>-1</sup>        | 49               |
| AC// NiCo <sub>2</sub> O <sub>4</sub>                      | 27.2 W h kg <sup>-1</sup>        | 102 W kg <sup>-1</sup>         | 50               |
| AC// Ni-Co oxide                                           | 12 W h kg <sup>-1</sup>          | 95 W kg <sup>-1</sup>          | 1                |
| RuO <sub>2</sub> //RuO <sub>2</sub>                        | 18.77 Wh kg <sup>-1</sup>        | 500 W kg <sup>-1</sup>         | 2                |
| Fe <sub>2</sub> O <sub>3</sub> /FGS//MnO <sub>2</sub> /FGS | 50.7 Wh kg <sup>-1</sup>         | 100 W kg <sup>-1</sup>         | 3                |
| <b>AC// NiCo<sub>2</sub>O<sub>4</sub></b>                  | <b>29.76 W h kg<sup>-1</sup></b> | <b>159.4 W kg<sup>-1</sup></b> | <b>This work</b> |

## Reference

1. C. H. Tang, Z. Tang and H. Gong, *J. Electrochem. Soc.*, 2012, **159**, A651-A656.
2. H. Xia, Y. S. Meng, G. L. Yuan, C. Cui, L. Lu, *Electrochem. Solid-State Lett.*, 2012, **15**, A60-A63.
3. H. Xia, C. Y. Hong, Bo Li , B. Zhao, Z. X. Lin , M. B. Zheng, S. V. Savilov, S. M.. Aldoshin, *Adv. Funct. Mater.* 2015, **25**, 627–635.
